# Supplementary material for: Annual Censuses and Citizen Science Data Show Rapid Population Increases and Range Expansion of Invasive Rose-Ringed and Monk Parakeets in Seville, Spain
Source: MDPI journal article supplement (doi:10.3390/ani12060677), 2022-03-08
Supplement: s1 [file s1]

## Supplementary material

*Annual censuses and citizen science data show rapid population increases and range expansion of invasive Rose-ringed and Monk parakeets in Seville, Spain*

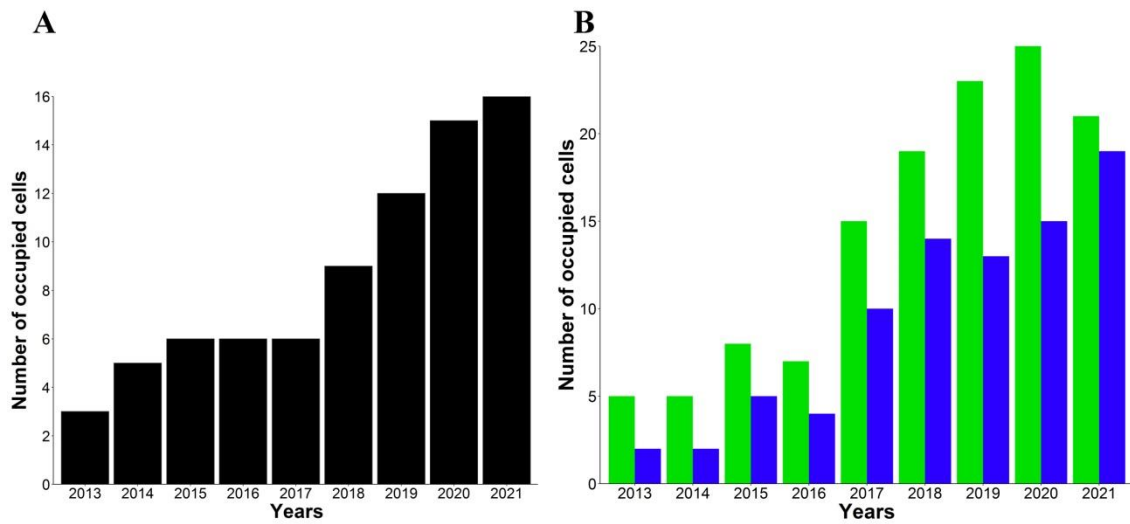

**Figure S1.** Temporal evolution of the spatial distribution of rose-ringed and monk parakeets in the metropolitan area of Seville (southern Spain). Graphs show the cumulative number of 5x5 km occupied cells over time (2013-2021) regarding A) monk parakeet nests and B) observations of both parakeet species (green bars: rose-ringed parakeets, blue bars: monk parakeets) recorded by citizen science (eBird and Observation).

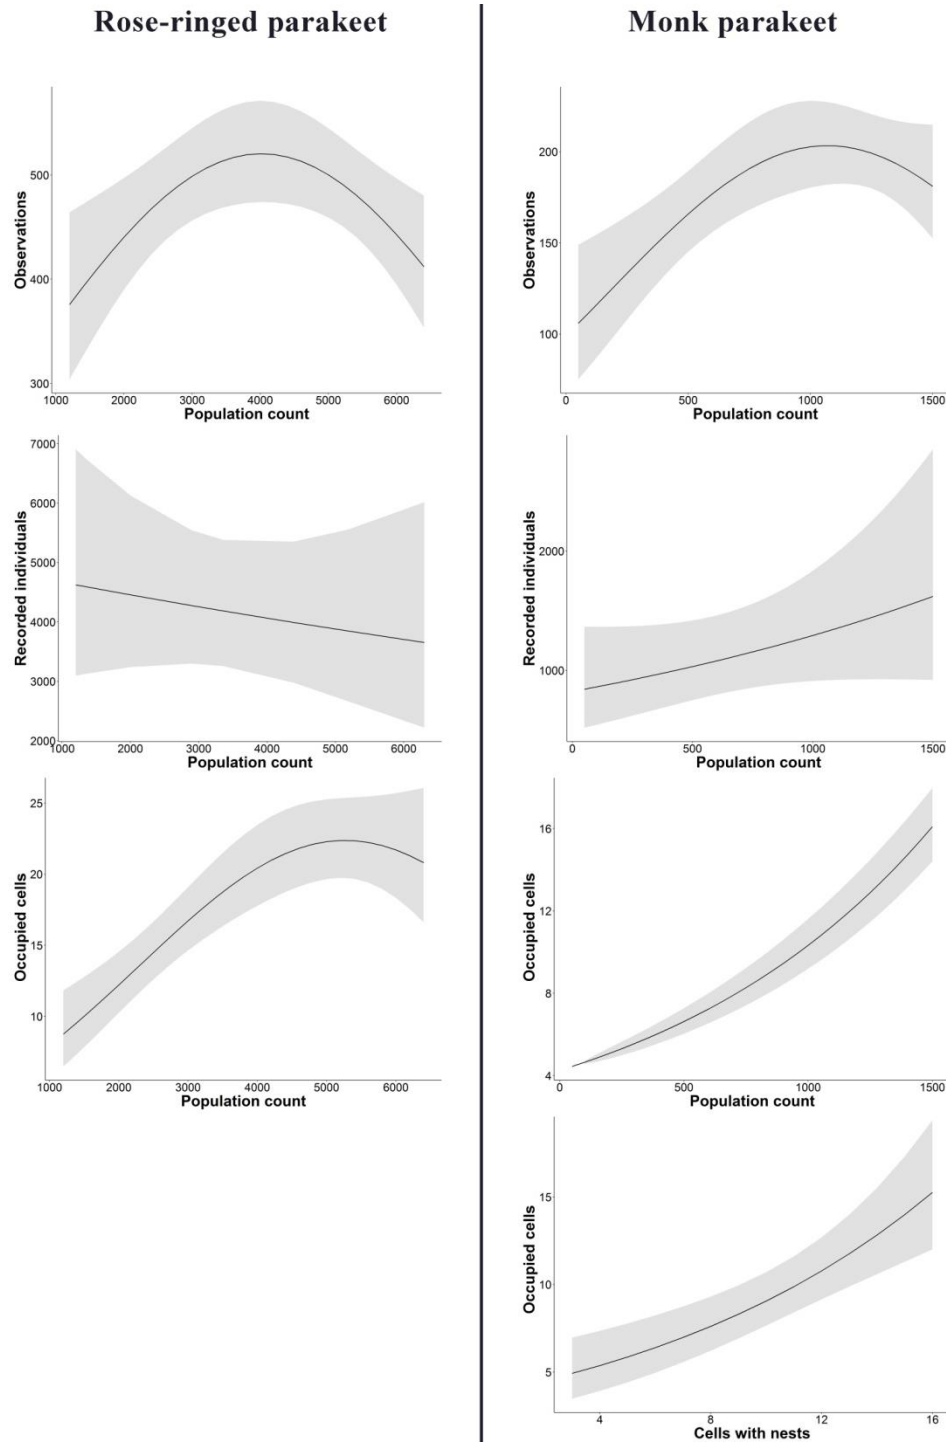

**Figure S2.** Relationship between the number of observations, the number of recorded individuals, and the number of occupied cells included in the citizen science platforms and our population counts of rose-ringed and monk parakeets and the number of cells with monk parakeet nests. All models included the number of bird observations or the number of cells with bird observations as an offset variable to control for differences in sampling effort over years.

**Table S1.** Annual population sizes of rose-ringed and monk parakeets established in the metropolitan area of Seville from 2013 to 2021. For the monk parakeet, we estimated the associated 95% CI.

| Year | Rose-ringed parakeet | Monk parakeet |
|------|----------------------|---------------|
| 2013 | 1200                 | 70 ± 13       |
| 2014 |                      | 100 ± 19      |
| 2015 | 1367                 | 199 ± 37      |
| 2016 | 2000                 | 372 ± 69      |
| 2017 | 2891                 | 587 ± 108     |
| 2018 | 3360                 | 904 ± 167     |
| 2019 | 4338                 | 1043 ± 192    |
| 2020 | 5185                 | 1307 ± 241    |
| 2021 | 6300                 | 1487 ± 273    |

**Table S2.** Generalized linear models (GLM; negative binomial error distribution, log link function) obtained to test the population trend (Survey) of rose-ringed and monk parakeets in the metropolitan area of Seville from 2013 to 2021. Final models were the model with the lowest AIC. dev. expl.: deviance explained (%).

| Rose-ringed parakeet       |                   |          |       |          |          |        |            |
|----------------------------|-------------------|----------|-------|----------|----------|--------|------------|
| Model                      | Variable          | Estimate | SE    | <i>z</i> | <i>p</i> | AIC    | dev. expl. |
| Survey ~Year               | Intercept         | -445.22  | 26.06 | -17.08   | <0.0001  | 117.89 | 97.23%     |
|                            | Year              | 0.22     | 0.01  | 3.87     | <0.0001  |        |            |
| Survey ~Year <sup>2</sup>  | Intercept         | 7.96     | 0.03  | 250.49   | <0.0001  | 119.73 |            |
|                            | Year              | 1.59     | 0.09  | 17.53    | <0.0001  |        |            |
|                            | Year <sup>2</sup> | 0.04     | 0.09  | 0.4      | 0.689    |        |            |
| Monk parakeet              |                   |          |       |          |          |        |            |
| Model                      | Variable          | Estimate | SE    | <i>z</i> | <i>p</i> | AIC    | dev. expl. |
| Survey ~ Year <sup>2</sup> | Intercept         | 6.07     | 0.02  | 262.44   | <0.0001  | 94.02  | 99.56%     |
|                            | Year              | 3.16     | 0.08  | 39.76    | <0.0001  |        |            |
|                            | Year <sup>2</sup> | -0.77    | 0.06  | -12.11   | <0.0001  |        |            |
| Survey ~ Year              | Intercept         | -800.56  | 63.9  | -12.53   | <0.0001  | 115.6  |            |
|                            | Year              | 0.4      | 0.03  | 12.63    | <0.0001  |        |            |

**Table S3.** Number of nesting substrates per tree species used by monk parakeets in the metropolitan area of Seville from 2013 to 2021.

| Tree species                        | Family       | Total | Percentage (%) |
|-------------------------------------|--------------|-------|----------------|
| <i>Phoenix dactylifera</i>          | Arecaceae    | 527   | 73.81          |
| <i>Phoenix canariensis</i>          | Arecaceae    | 106   | 14.85          |
| <i>Washingtonia robusta</i>         | Arecaceae    | 25    | 3.50           |
| <i>Washingtonia filifera</i>        | Arecaceae    | 24    | 3.36           |
| <i>Platanus</i> × <i>acerifolia</i> | Platanaceae  | 12    | 1.68           |
| <i>Trachycarpus fortunei</i>        | Arecaceae    | 10    | 1.40           |
| <i>Yucca gigantea</i>               | Asparagaceae | 6     | 0.84           |
| <i>Eucalyptus camaldulensis</i>     | Myrtaceae    | 2     | 0.28           |
| <i>Ulmus minor</i>                  | Ulmaceae     | 2     | 0.28           |

**Table S4.** Linear model (LM), quadratic regression model (QM), and generalized additive model (GAM) obtained to test the temporal trend of the mean annual number of active chambers per nest in a monk parakeet population established in the metropolitan area of Seville from 2013 to 2021. In GAM, the independent variable (Year) is denoted by smooth terms. edf: effective degrees of freedom, Ref.df: reference degrees of freedom used in computing test statistic and the p-values. GAM was significantly better than LM and QM (ANOVA;  $p < 0.013$ ).

| Linear model (LM)                |                      |          |        |          |          |                |
|----------------------------------|----------------------|----------|--------|----------|----------|----------------|
| Dependent variable               | Independent variable | Estimate | ±SE    | <i>t</i> | <i>p</i> | R <sup>2</sup> |
| Number mean of chambers          | Intercept            | -201.75  | 52.67  | -3.83    | 0.006    | 0.64           |
|                                  | Year                 | 0.1      | 0.02   | 3.87     | 0.006    |                |
| Quadratic regression model (QM)  |                      |          |        |          |          |                |
| Dependent variable               | Independent variable | Estimate | ±SE    | <i>t</i> | <i>p</i> | R <sup>2</sup> |
| Number mean of chambers          | Intercept            | 1.95     | 0.04   | 45.74    | <0.0001  | 0.85           |
|                                  | Year                 | 0.78     | 0.13   | 6.11     | 0.0009   |                |
|                                  | Year <sup>2</sup>    | -0.43    | 0.13   | -3.38    | 0.015    |                |
| Generalized additive model (GAM) |                      |          |        |          |          |                |
| Dependent variable               | Independent variable | Estimate | ±SE    | <i>t</i> | <i>p</i> | R <sup>2</sup> |
| Number mean of chambers          | Intercept            | 1.95     | 0.04   | 45.93    | <0.0001  | 0.85           |
|                                  |                      | edf      | Ref.df | <i>F</i> | <i>p</i> |                |
|                                  | Year                 | 1.91     | 1.99   | 25.36    | 0.0014   |                |

**Table S5.** Models obtained to relate the number of rose-ringed and monk parakeet observations and individuals recorded in the citizen science platforms to our annual population counts (Survey) conducted in the metropolitan area of Seville from 2013 to 2021. The number of bird observations recorded in these platforms was fitted as an offset variable to control for changes in sampling effort over years. We also include models obtained to relate the number of cells with rose-ringed and monk parakeet observations recorded in these platforms to the annual population counts and the number cells with monk parakeet nests (Nests). The number of cells with bird observations recorded in these platforms was fitted as an offset variable to control for changes in sampling effort over years.

| <b>Rose-ringed parakeets</b> |                             |                 |           |                |          |
|------------------------------|-----------------------------|-----------------|-----------|----------------|----------|
| <b>Dependent variable</b>    | <b>Independent variable</b> | <b>Estimate</b> | <b>SE</b> | <b>z</b>       | <b>p</b> |
| Number of observations       | Intercept                   | -3.46           | 0.13      | -26.49         | <0.0001  |
|                              | Survey                      | <0.0001         | <0.0001   | 0.52           | 0.6      |
| Number of observations       | Intercept                   | -3.43           | 0.04      | -82.4          | <0.0001  |
|                              | Survey                      | 0.16            | 0.12      | 1.29           | 0.19     |
|                              | Survey <sup>2</sup>         | -0.3            | 0.11      | -2.8           | 0.005    |
| Number of individuals        | Intercept                   | <-0.0001        | <0.0001   | -0.62          | 0.54     |
|                              | Survey                      | -1              | 0.06      | -16.97         | <0.0001  |
| Number of individuals        | Intercept                   | -1.34           | 0.13      | -10.73         | <0.0001  |
|                              | Survey                      | -0.24           | 0.35      | -0.67          | 0.502    |
|                              | Survey <sup>2</sup>         | -0.23           | 0.35      | -0.64          | 0.522    |
| Number of cells              | Intercept                   | -1.45           | 0.11      | -9.41          | <0.0001  |
|                              | Survey                      | 0.0001          | 0.31      | 2.92           | 0.00353  |
| Number of cells              | Intercept                   | -1              | 0.06      | -16.97         | <0.0001  |
|                              | Survey                      | 0.98            | 0.17      | 5.28           | <0.0001  |
|                              | Survey <sup>2</sup>         | -0.41           | 0.15      | -2.69          | 0.008    |
| <b>Monk parakeets</b>        |                             |                 |           |                |          |
| <b>Dependent variable</b>    | <b>Independent variable</b> | <b>Estimate</b> | <b>SE</b> | <b>z value</b> | <b>p</b> |
| Number of observations       | Intercept                   | -4.35           | 0.13      | -32.45         | <0.0001  |
|                              | Survey                      | 0.0003          | 0.0001    | 2.62           | 0.0237   |
| Number of observations       | Intercept                   | -4.2            | 0.06      | -6.6           | <0.0001  |
|                              | Survey                      | 0.63            | 0.2       | 3.2            | <0.002   |

|                       |           |         |         |        |         |
|-----------------------|-----------|---------|---------|--------|---------|
|                       | Survey2   | -0.35   | 0.15    | -2.41  | 0.02    |
|                       | Intercept | -2.38   | 0.03    | -75.71 | <0.0001 |
| Number of individuals | Survey    | <0.0001 | <0.0001 | 0.791  | 0.429   |
|                       | Intercept | -2.56   | 0.13    | -18.98 | <0.0001 |
| Number of individuals | Survey    | 0.72    | 0.41    | 1.77   | 0.08    |
|                       | Survey2   | -0.62   | 0.4     | -1.53  | 0.12    |
|                       | Intercept | -2.12   | 0.14    | -14.54 | <0.0001 |
| Number of cells       | Survey    | 0.0009  | 0.0001  | 6.63   | <0.0001 |
|                       | Intercept | -1.56   | 0.07    | -22.16 | <0.0001 |
| Number of cells       | Survey    | 1.51    | 0.21    | 7.06   | <0.0001 |
|                       | Survey2   | -0.28   | 0.17    | -1.69  | 0.09    |
|                       | Intercept | -2.24   | 0.23    | -9.77  | <0.0001 |
| Number of cells       | Nests     | 0.09    | 0.02    | 4.57   | <0.0001 |
|                       | Intercept | -1.52   | 0.09    | -16.4  | <0.0001 |
| Number of cells       | Nests     | 1.32    | 0.27    | 4.97   | <0.0001 |
|                       | Nests2    | -0.39   | 0.26    | -1.51  | 0.13    |

---
